# Supplementary material for: Acidic Microenvironment Determines Antibiotic Susceptibility and Biofilm Formation of Pseudomonas aeruginosa
Source: PubMed Central journal article supplement (PMC8640179; doi:10.3389/fmicb.2021.747834), 2021-11-19
Supplement: Data_Sheet_1.pdf [file Data_Sheet_1.pdf]

## Supplementary data

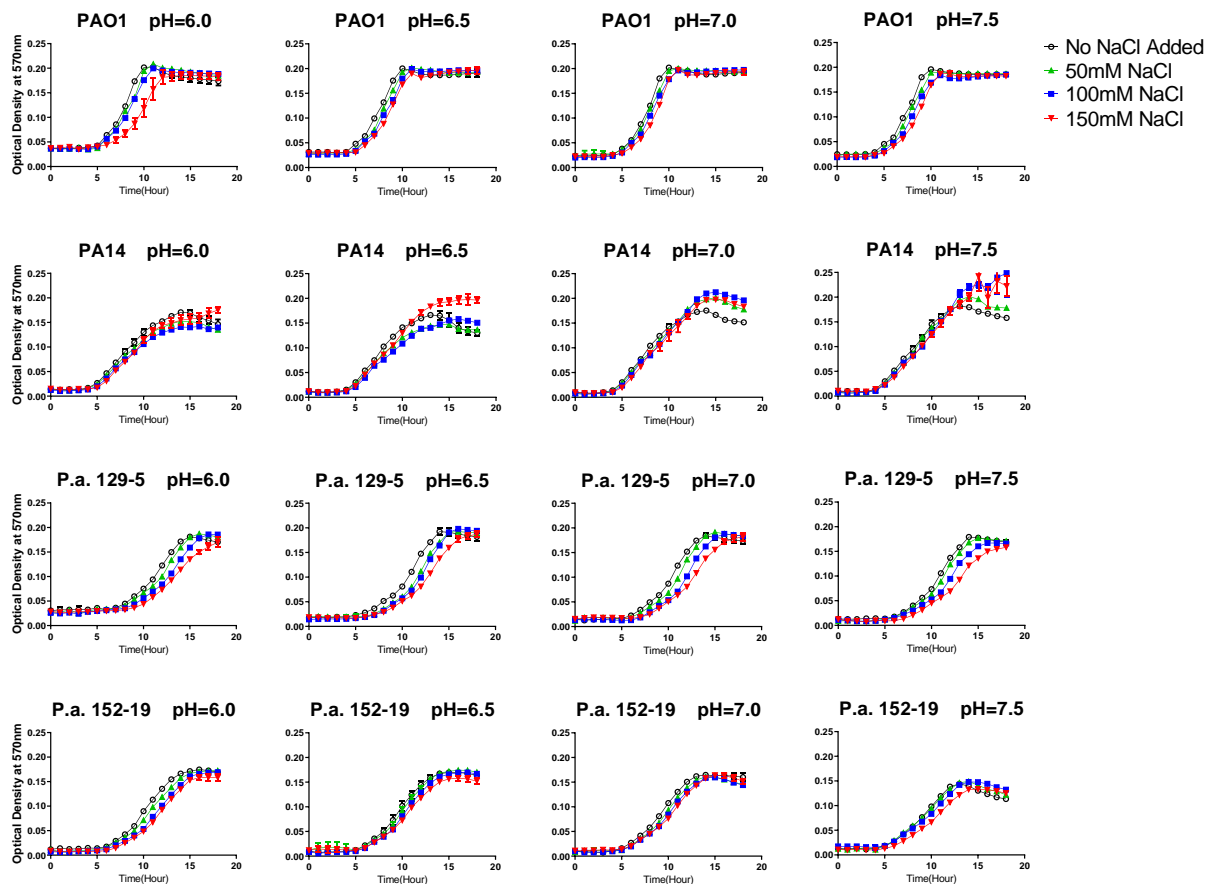

**Fig. S1. Adjusted salt and pH conditions do not significantly affect the proliferation rate of planktonic *P. aeruginosa*.** PAO1, PA14, *P.a.*129-5 and *P.a.*152-19 were inoculated in 10% TSB (n=3). The salt concentration of the culture media was adjusted by the addition of 50, 100, and 150mM NaCl. No NaCl group (pH=7.5) was used as a control. Optical density at 570nm was measured every hour for 18 hours at 37°C in a microplate reader.

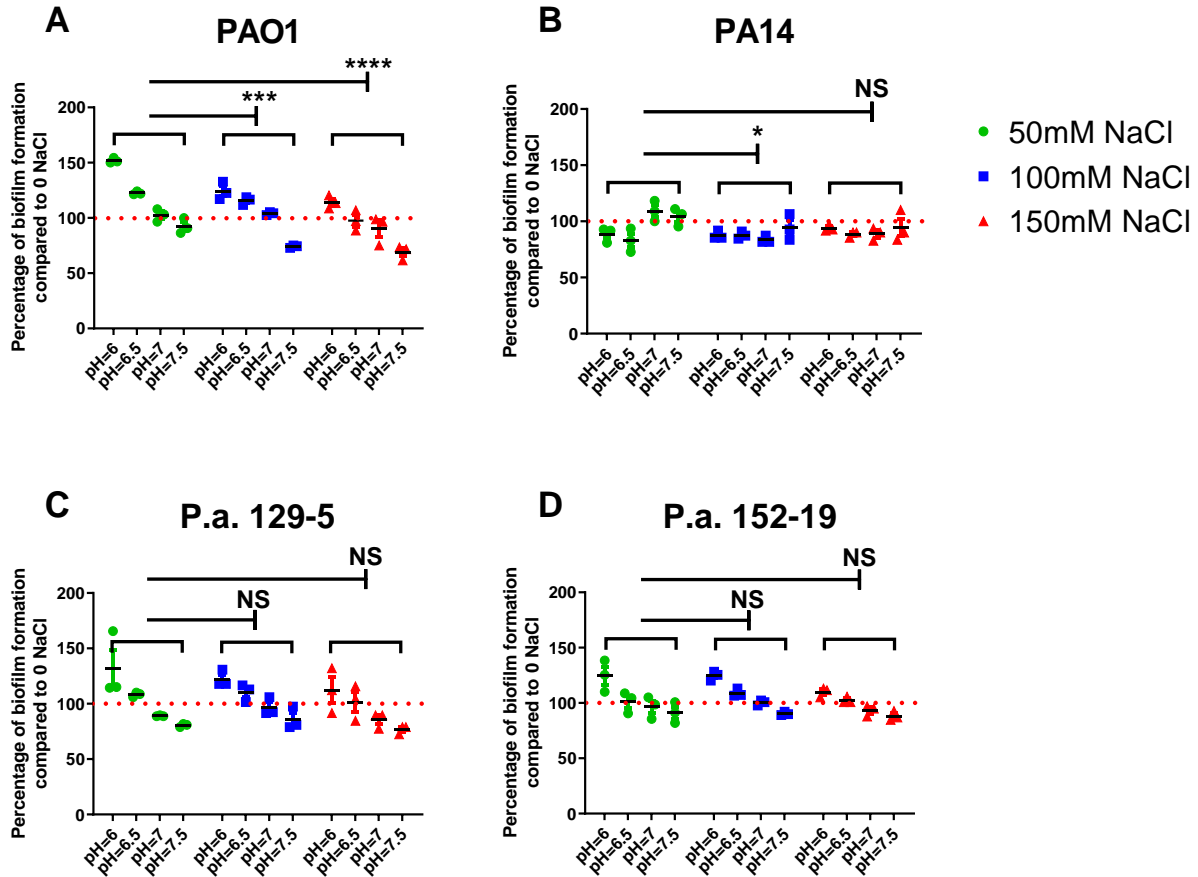

**Fig. S2. Elevated NaCl concentrations have minimal effect on *P. aeruginosa* biofilm formation but acidic pH promotes *P. aeruginosa* biofilm formation. (A to D) Effect of NaCl (50, 100 and 150mM) and pH (6.0, 6.5, 7.0 and 7.5) on *P. aeruginosa* biofilm formation compared to positive controls (n=3). Bacteria were incubated for 3 hours at 37°C in 96-well microplates. The crystal violet staining method was used to quantify the biofilm/biomass attachment. The red dotted lines denote the (+) control of biofilm formation at pH 7.5 without additional NaCl. Data are mean  $\pm$  SEM. Two-way ANOVA was used for statistical analysis.**

\*\* $p < 0.01$ ; \*\*\* $p < 0.001$ ; \*\*\*\* $p < 0.0001$ ; NS: not significant.

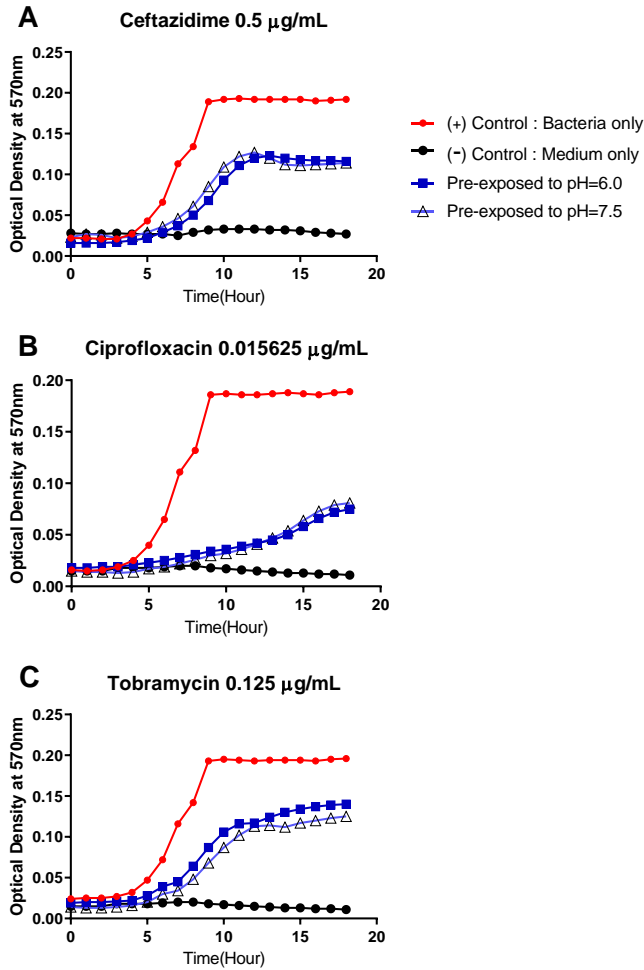

**Fig. S3. Antibiotics restore their antimicrobial activity in physiological pH conditions after prior exposure to an acidic environment.** Antibiotics (ceftazidime, ciprofloxacin, and tobramycin) were pre-exposed to pH = 6.0 or 7.5 in 10% TSB for 5 hours, the pH for all exposed antibiotics was then re-adjusted back to 7.5 before the antibiotics were added into planktonic *P. aeruginosa* (PAO1) culture for GIA at pH 7.5. The applied treatment concentration for each antibiotic was selected using less than their respective MIC to demonstrate the partial inhibition of bacterial growth. Optical density at 570nm was measured every hour for 18 hours at 37°C in a microplate reader. Results are mean  $\pm$  SD from two independent experiments with bacteria grew in duplicates for each condition.

## Ouabain and DMSO vehicle are not bactericidal to PAO1

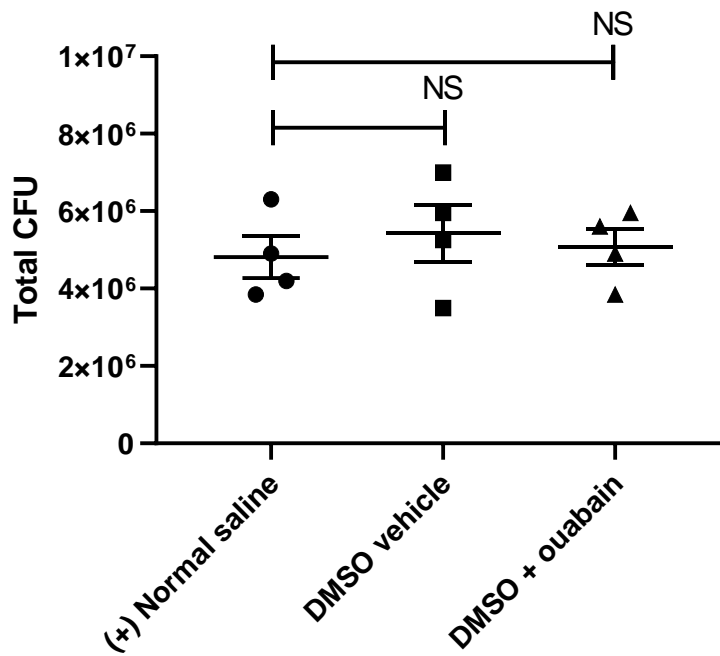

**Fig. S4. Ouabain treatment was not bactericidal to PAO1.** A total volume of  $50 \mu\text{L}$  of  $2 \times 10^8$  CFU/mL PAO1 and  $20 \mu\text{L}$  of  $20 \mu\text{M}$  Ouabain or DMSO (solvent control) were incubated in normal saline for 5 hours at  $37^\circ\text{C}$  ( $n=4$ ). Data are mean  $\pm$  SEM from two repeated experiments. Student's *t*-tests were used for statistical analysis. NS: not significant.

### TEER on *P. aeruginosa* treated Human Epithelial Cells

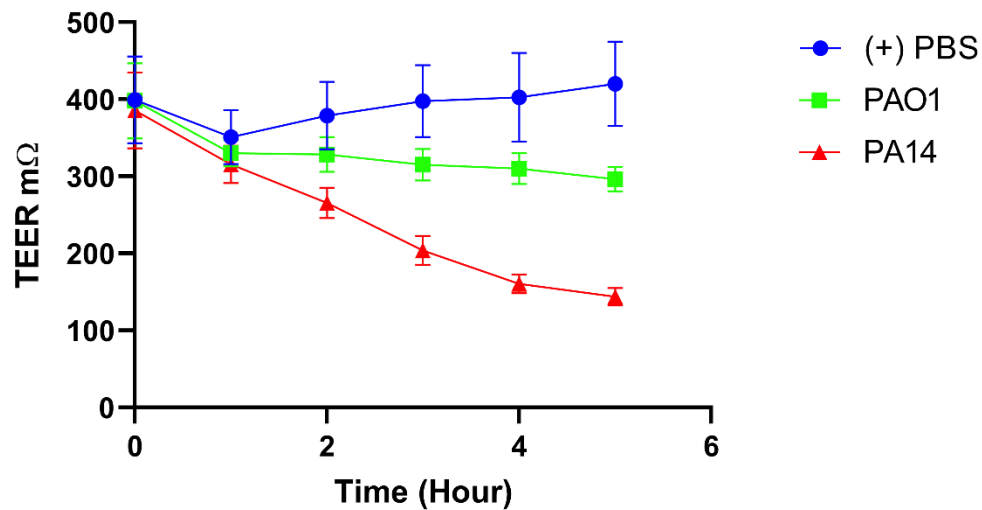

**Fig. S5. Comparison of acute bacterial virulence on CFBE cells.** Polarized CFWT airway epithelial cells on the air-liquid interface were treated with PBS, PAO1, or PA14. Trans-epithelial electrical resistance (TEER) was measured every hour for 5 hours. Positive (+) control is PBS only (on apical sides). Data were collected from two independent experiments (n=4).

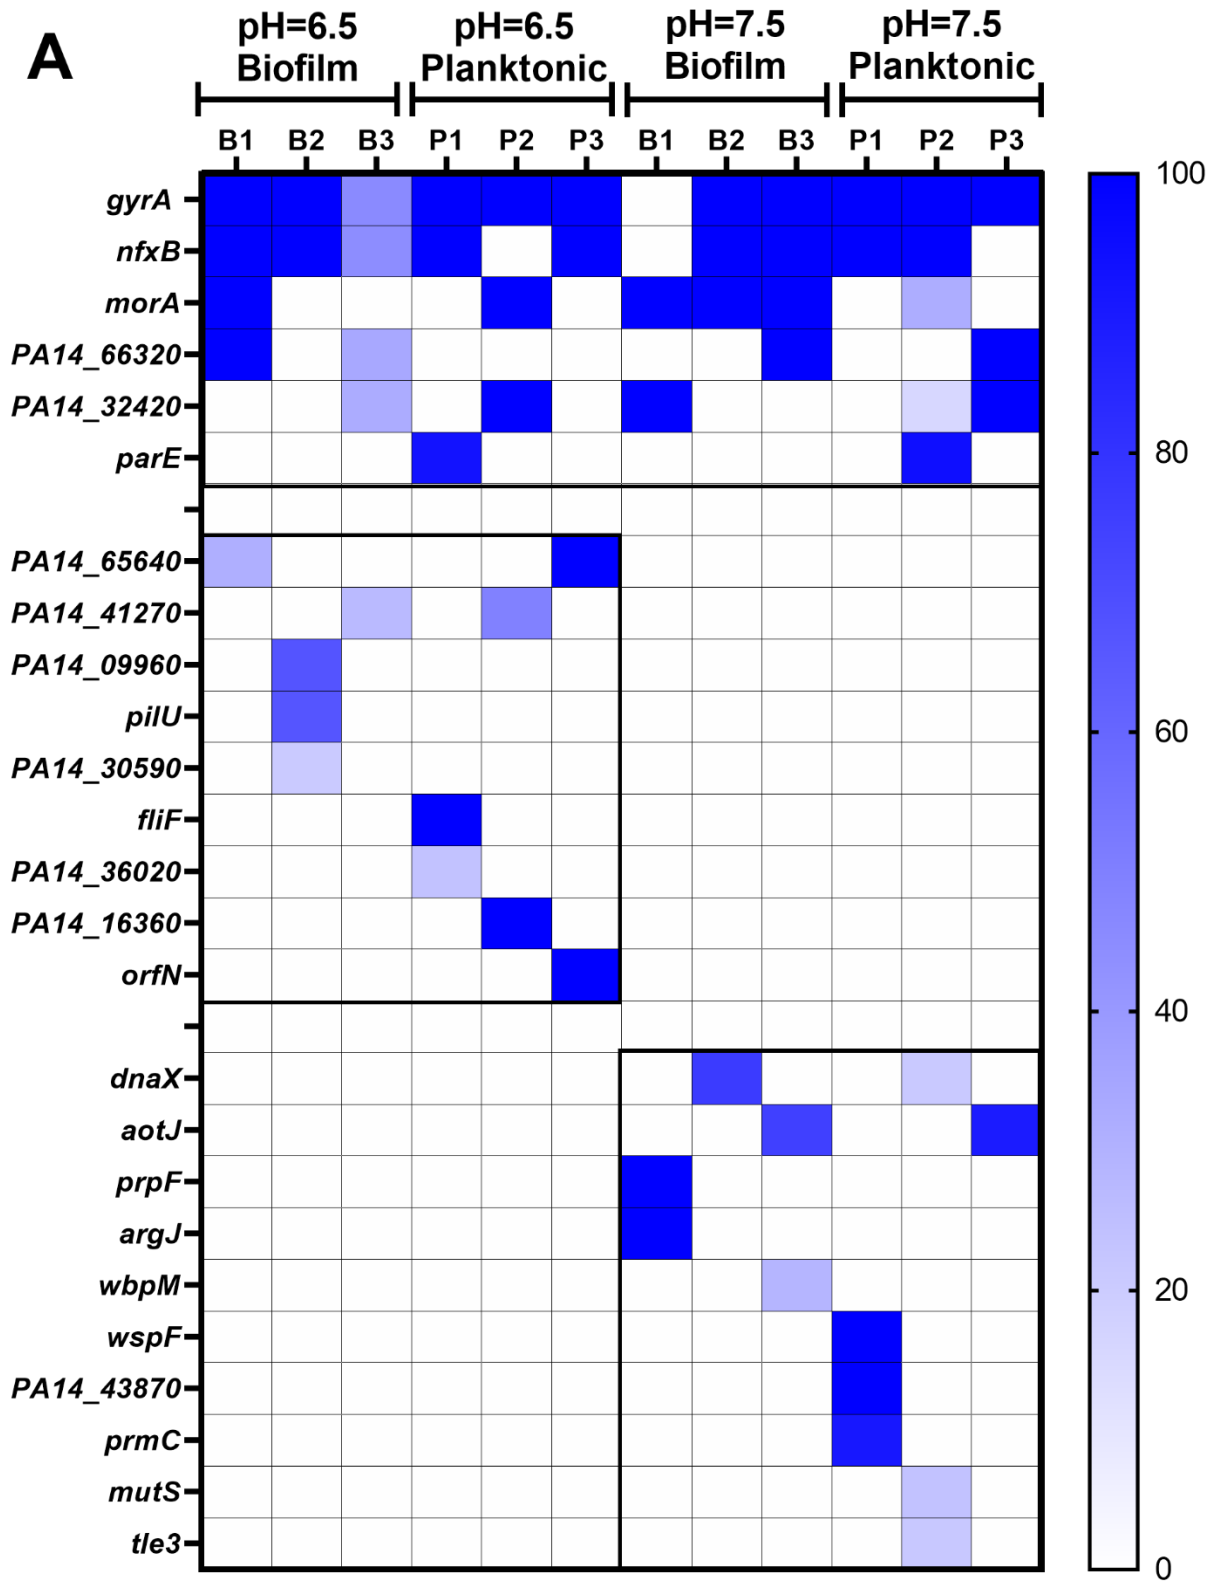

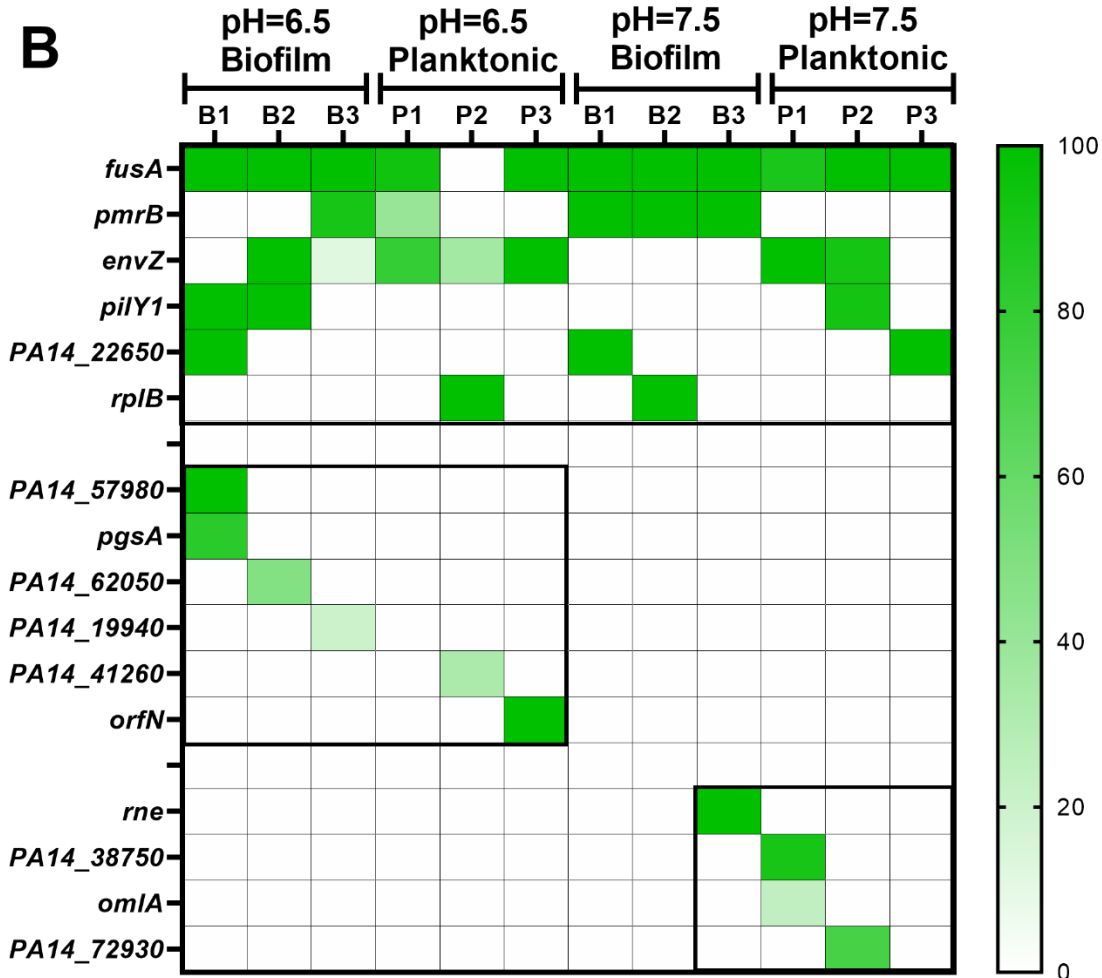

**Fig. S6. PA14 population mutations were identified after 15 days of evolution with ciprofloxacin or tobramycin. (A) Mutations detected from the ciprofloxacin treated PA14 populations; (B) Mutations detected from the tobramycin treated PA14 populations. Each bacterial lifestyle/pH was evolved in triplicate populations. Biofilm (B) /planktonic (P) populations were labeled as B1, B2, B3, and P1, P2, P3, respectively. Color scale bars represent mutation frequency, which ranges from 0 to 100%.**

**Supplementary Table 1. Effects of acidic pH on *P. aeruginosa* antibiotic tolerance in MIC changes.** MIC data were acquired using the GIA assay. Results are averaged MICs from two independent GIA experiments.

| Ceftazidime MIC (µg/mL) |        |                    |                    |                                      | Ciprofloxacin MIC (µg/mL) |        |                    |                    |                                      | Tobramycin MIC (µg/mL) |        |                    |                    |                                      |
|-------------------------|--------|--------------------|--------------------|--------------------------------------|---------------------------|--------|--------------------|--------------------|--------------------------------------|------------------------|--------|--------------------|--------------------|--------------------------------------|
| NO.                     | Strain | pH 6.5 average MIC | pH 7.5 average MIC | MIC fold increase from pH 6.5 to 7.5 | NO.                       | Strain | pH 6.5 average MIC | pH 7.5 average MIC | MIC fold increase from pH 6.5 to 7.5 | NO.                    | Strain | pH 6.5 average MIC | pH 7.5 average MIC | MIC fold increase from pH 6.5 to 7.5 |
| 1                       | PAO1   | 1.875              | 0.9375             | 2                                    | 1                         | PAO1   | 0.0390625          | 0.0390625          | 1                                    | 1                      | PAO1   | 2.5                | 0.9375             | 3                                    |
| 2                       | PA14   | 2.5                | 1.25               | 2                                    | 2                         | PA14   | 0.07813            | 0.0390625          | 2                                    | 2                      | PA14   | 3.75               | 1.25               | 3                                    |
| 3                       | 116-37 | 2.5                | 0.9375             | 3                                    | 3                         | 116-37 | 0.07813            | 0.0390625          | 2                                    | 3                      | 116-37 | 1.25               | 0.3125             | 4                                    |
| 4                       | 71-75  | 0.625              | 0.15625            | 4                                    | 4                         | 71-75  | 0.15625            | 0.1171875          | 1                                    | 4                      | 71-75  | 2.5                | 0.625              | 4                                    |
| 5                       | KK1    | 2.5                | 1.25               | 2                                    | 5                         | KK1    | 0.03906            | 0.0390625          | 1                                    | 5                      | KK1    | 5                  | 1.25               | 4                                    |
| 6                       | AA43   | 5                  | 2.5                | 2                                    | 6                         | AA43   | 0.15625            | 0.078125           | 2                                    | 6                      | AA43   | 10                 | 1.875              | 5                                    |
| 7                       | 40-21  | 2.5                | 1.25               | 2                                    | 7                         | 40-21  | 0.07813            | 0.0390625          | 2                                    | 7                      | 40-21  | 1.25               | 0.3125             | 4                                    |
| 8                       | 151-40 | 5                  | 2.5                | 2                                    | 8                         | 151-40 | 0.9375             | 0.625              | 2                                    | 8                      | 151-40 | 2.5                | 1.25               | 2                                    |
| 9                       | 129-5  | 5                  | 1.25               | 4                                    | 9                         | 129-5  | 0.07813            | 0.0390625          | 2                                    | 9                      | 129-5  | 0.625              | 0.625              | 1                                    |
| 10                      | 109-10 | 2.5                | 1.25               | 2                                    | 10                        | 109-10 | 0.15625            | 0.05859375         | 3                                    | 10                     | 109-10 | 10                 | 2.5                | 4                                    |
| 11                      | 480-1  | 0.625              | 0.15625            | 4                                    | 11                        | 480-1  | 0.01464845         | 0.0146485          | 1                                    | 11                     | 480-1  | 0.9375             | 0.3125             | 3                                    |
| 12                      | 82-9   | 2.5                | 1.25               | 2                                    | 12                        | 82-9   | 0.07813            | 0.0390625          | 2                                    | 12                     | 82-9   | 5                  | 0.625              | 8                                    |
| 13                      | 152-19 | 5                  | 2.5                | 2                                    | 13                        | 152-19 | 0.07813            | 0.0390625          | 2                                    | 13                     | 152-19 | 1.25               | 0.625              | 2                                    |
| 14                      | 80-37  | 2.5                | 1.25               | 2                                    | 14                        | 80-37  | 0.0390625          | 0.0390625          | 1                                    | 14                     | 80-37  | 5                  | 0.9375             | 5                                    |



**Supplementary Table 2. List of primers used for quantitative real-time PCR.**

| Gene          | Primer sequence |                                        |
|---------------|-----------------|----------------------------------------|
| <i>tolA</i>   | Forward         | 5' - GCG TAA TGG AAT GAG CGT AGA A -3' |
|               | Reverse         | 5' - CGA ACT GTC GAA AGG CTT GT - 3'   |
| <i>ndvB</i>   | Forward         | 5' - TGT GGA TCG CCT ACG ACT A - 3'    |
|               | Reverse         | 5' - CGG TGA ACA GCA CGA TGA - 3'      |
| <i>mucB</i>   | Forward         | 5'-TTT GCT TGG CAG CCT GAT-3'          |
|               | Reverse         | 5'-GGT GCC TTG GAA ACT GTT CT-3'       |
| <i>exoS</i>   | Forward         | 5'-GAC AGG CTG AAC AGG TAG TG-3'       |
|               | Reverse         | 5'-TTC AGG GAG GTG GAG AGA TAG-3'      |
| <i>exoT</i>   | Forward         | 5'-GCT GAA CAG GTC GTG AAG A-3'        |
|               | Reverse         | 5'-CCG GGA GGT GGA GAG ATA G-3'        |
| <i>fimT</i>   | Forward         | 5'-CGC TTG CAA AGA AGG AAA GG-3'       |
|               | Reverse         | 5'-CCT TCC GCA GAG CAG AAA-3'          |
| <i>fimX</i>   | Forward         | 5'-CCT GGC CTA TAT CCA TCT CAA C-3'    |
|               | Reverse         | 5'-ACT GTT CAC GCA TCA GTC C-3'        |
| <i>rhlA</i>   | Forward         | 5'-CGA GAC CGT CGG CAA ATA C-3'        |
|               | Reverse         | 5'-GCA CCT GGT CGA TGT GAA A-3'        |
| <i>rhlB</i>   | Forward         | 5'-CTC ACG AGA AGT ACG GGA TTC-3'      |
|               | Reverse         | 5'-CTC GGG CAC GTT GAA CT-3'           |
| <i>rplU</i> * | Forward         | 5'-CGC AGT GAT TGT TAC CGG TG-3'       |
|               | Reverse         | 5'-AGG CCT GAA TGC CGG TGA TC-3'       |

\*The constitutively expressed *rplU* gene served as a reference gene.
